# Supplementary material for: Different effects in the selective detection of aniline and Fe3+ by lanthanide-based coordination polymers containing multiple reactive sites
Source: Royal Society of Chemistry journal article supplement (doi:10.1039/d0ce00238k), 2020-01-01
Supplement: d0ce00238k1.pdf [file d0ce00238k1.pdf]

## Supporting information

### Different Effect in the Selective Detection of Aniline and Fe<sup>3+</sup> by Lanthanide-Based Coordination Polymers Containing Multiple Reactive Sites

Xinfang Liu,<sup>a,\*</sup> Liyong Du,<sup>b</sup> Rongfang Li,<sup>a</sup> Ningning Ma,<sup>a</sup> Mengdi You<sup>a</sup> and Xun  
Feng<sup>a,\*</sup>

<sup>a</sup> College of Chemistry and Chemical Engineering, Henan Key Laboratory of  
Function Oriented Porous Materials, Luoyang Normal University, Luoyang, 471934,  
China.

<sup>b</sup> School of Chemical and Material Engineering, Jiangnan University, Wuxi, 214122,  
PR China.

Table S1. Crystal data and refinement parameters of **1-Eu** and **2-Tb**.

|                                             | <b>1-Eu</b>                                         | <b>2-Tb</b>                                         |
|---------------------------------------------|-----------------------------------------------------|-----------------------------------------------------|
| Empirical formula                           | C <sub>14</sub> H <sub>16</sub> NO <sub>11</sub> Eu | C <sub>14</sub> H <sub>16</sub> NO <sub>11</sub> Tb |
| Formula weight                              | 526.24                                              | 533.20                                              |
| Crystal system                              | Monoclinic                                          | Monoclinic                                          |
| Space group                                 | P2 <sub>1</sub> /c                                  | P2 <sub>1</sub> /c                                  |
| a/Å                                         | 12.4793(8)                                          | 12.4886(7)                                          |
| b/Å                                         | 13.8564(6)                                          | 14.0071(6)                                          |
| c/Å                                         | 10.7865(6)                                          | 10.8593(6)                                          |
| β/°                                         | 113.602(7)                                          | 114.000(6)                                          |
| Volume/Å <sup>3</sup>                       | 1709.16(18)                                         | 1735.38(17)                                         |
| Z                                           | 4                                                   | 4                                                   |
| ρ <sub>calc</sub> /cm <sup>3</sup>          | 2.045                                               | 2.041                                               |
| μ/mm <sup>-1</sup> /F(000)                  | 3.732 / 1032.0                                      | 4.137/1040.0                                        |
| Crystal size/mm <sup>3</sup> F(000)         | 0.21 × 0.19 × 0.18                                  | 0.21 × 0.20 × 0.18                                  |
| 2θ range for data                           | 6.876 to 54.932                                     | 6.826 to 58.568                                     |
| Index ranges Radiation                      | -16 ≤ h ≤ 15, -17 ≤ k ≤ 17,<br>-12 ≤ l ≤ 13         | -13 ≤ h ≤ 16, -18 ≤ k ≤<br>16,<br>-11 ≤ l ≤ 0       |
| Data/restraints/parameters                  | 3391/0/251                                          | 4082/0/250                                          |
| Final R indexes [I ≥ 2σ]                    | R <sub>1</sub> = 0.0409, wR <sub>2</sub> = 0.0989   | R <sub>1</sub> = 0.0349, wR <sub>2</sub> =          |
| Final R indexes [all]                       | R <sub>1</sub> = 0.0445, wR <sub>2</sub> = 0.1024   | R <sub>1</sub> = 0.0407, wR <sub>2</sub> =          |
| Largest diff. peak/hole / e Å <sup>-3</sup> | 2.73/-2.58                                          | 1.41/-1.52                                          |

Table S2. Selected bond lengths and bond angles in **1-Eu**

| Bond          | Length/Å   | Bond         | Length/Å   |
|---------------|------------|--------------|------------|
| Eu1-O1#1      | 2.522(3)   | Eu1-O9       | 2.489(3)   |
| Eu1-O4        | 2.454(3)   | Eu1-O10      | 2.475(3)   |
| Eu1-O6        | 2.378(4)   | Eu1-O2#1     | 2.510(3)   |
| Eu1-O7        | 2.400(4)   | Eu1-N1       | 2.543(4)   |
| Eu1-O8        | 2.445(3)   |              |            |
| Bond          | Angle/°    | Bond         | Angle/°    |
| O2#1-Eu1-N1   | 133.84(12) | O6-Eu1-N1    | 63.43(12)  |
| O2#1-Eu1-O1#1 | 51.98(12)  | O9-Eu1-O6    | 73.43(12)  |
| O4-Eu1-O6     | 126.91(12) | O9-Eu1-O7    | 134.59(12) |
| O4-Eu1-O7     | 77.32(12)  | O9-Eu1-O8    | 68.05(12)  |
| O4-Eu1-O8     | 135.97(12) | O9-Eu1-O1#1  | 98.75(11)  |
| O4-Eu1-O9     | 145.89(13) | O9-Eu1-O2#1  | 72.11(11)  |
| O4-Eu1-O10    | 81.46(12)  | O9-Eu1-N1    | 129.20(12) |
| O4-Eu1-O2#1   | 78.61(11)  | O8-Eu1-O1#1  | 70.32(11)  |
| O4-Eu1-O1#1   | 75.68(11)  | O8-Eu1-O2#1  | 100.59(11) |
| O4-Eu1-N1     | 63.57(12)  | O8-Eu1-N1    | 124.78(12) |
| O7-Eu1-O8     | 67.59(12)  | O10-Eu1-O6   | 77.37(14)  |
| O7-Eu1-O1#1   | 75.02(12)  | O10-Eu1-O7   | 144.80(12) |
| O7-Eu1-O2#1   | 125.61(12) | O10-Eu1-O8   | 141.76(11) |
| O7-Eu1-N1     | 72.34(13)  | O10-Eu1-O9   | 74.91(11)  |
| O6-Eu1-O7     | 89.65(12)  | O10-Eu1-O1#1 | 126.07(12) |
| O6-Eu1-O8     | 79.73(11)  | O10-Eu1-O2#1 | 76.07(12)  |
| O6-Eu1-O1#1   | 149.70(11) | O10-Eu1-N1   | 73.14(12)  |
| O6-Eu1-O2#1   | 142.44(11) | O1#1-Eu1-N1  | 132.00(11) |

#1, -1+x, y, -1+z.

Table S3. Selected bond lengths and bond angles in **2-Tb**

| Bond         | Length/Å   | Bond          | Length/Å   |
|--------------|------------|---------------|------------|
| Tb-O4        | 2.408(3)   | Tb-O8         | 2.480(4)   |
| Tb-O9        | 2.426(3)   | Tb-O2#1       | 2.487(3)   |
| Tb-O6        | 2.333(3)   | Tb-N1         | 2.502(4)   |
| Tb-O7        | 2.460(3)   | Tb-O1#1       | 2.493(3)   |
| Tb-O10       | 2.395(3)   |               |            |
| Bond         | Angle/°    | Bond          | Angle/°    |
| O4-Tb-O9     | 136.50(12) | O6-Tb-O1#1    | 140.96(12) |
| O4-Tb-O7     | 81.87(12)  | O7-Tb-O8      | 74.75(12)  |
| O4-Tb-O8     | 145.31(13) | O7-Tb-O2#1    | 74.81(12)  |
| O4-Tb-O2#1   | 76.24(11)  | O7-Tb – N1    | 72.43(12)  |
| O4-Tb-N1     | 64.24(11)  | O7-Tb – O2#1  | 125.50(11) |
| O4 -Tb-O1#1  | 78.07(12)  | O10-Tb-O4     | 78.49(12)  |
| O9 -Tb-O7    | 141.03(12) | O10-Tb-O7     | 144.46(13) |
| O9 -Tb-O8    | 67.97(12)  | O10-Tb-O8     | 134.01(12) |
| O9-Tb-O2#1   | 71.26(11)  | O10-Tb-O2#1   | 77.79(13)  |
| O9-Tb-N1     | 124.27(12) | O10-Tb-N1     | 72.41(13)  |
| O9-Tb – O1#1 | 102.73(13) | O10-Tb-O1#1   | 128.39(12) |
| O6-Tb-O4     | 128.19(12) | O10-Tb-O9     | 67.11(13)  |
| O6-Tb-O9     | 78.02(11)  | O8-Tb-O2#1    | 96.81(12)  |
| O6-Tb-O7     | 80.80(12)  | O8-Tb-N1      | 129.01(12) |
| O6-Tb-O10    | 88.46(12)  | O8-Tb-O1#1    | 71.34(13)  |
| O6-Tb-O8     | 73.12(12)  | O2#1 -Tb-N1   | 134.06(11) |
| O6-Tb-O2#1   | 149.20(11) | O2#1 -Tb-O1#1 | 52.20(12)  |
| O6-Tb-N1     | 64.01(11)  | O1#1-Tb-N1    | 132.58(13) |

#1, 1+x, y, 1+z; #2, -1+x, y, -1+z.

Table S4. Hydrogen bonds for **1-Eu** and **2-Tb**.

| <b>1-Eu</b>         |                 |                 |                 |                |
|---------------------|-----------------|-----------------|-----------------|----------------|
| <b>D-H-A</b>        | <b>d(D-H)/Å</b> | <b>d(H-A)/Å</b> | <b>d(D-A)/Å</b> | <b>D-H-A/°</b> |
| O7-H7A···O3#1       | 0.86            | 1.95            | 2.806(5)        | 170.7          |
| O8-H8B···O4#1       | 0.88            | 1.88            | 2.706(5)        | 155.8          |
| O9-H9B···O2#2       | 0.87            | 2.06            | 2.745(5)        | 135.8          |
| O10-H10B···O11      | 0.88            | 1.99            | 2.831(5)        | 159.7          |
| <b>2-Tb</b>         |                 |                 |                 |                |
| <b>D-H-A (2-Eu)</b> | <b>d(D-H)/Å</b> | <b>d(H-A)/Å</b> | <b>d(D-A)/Å</b> | <b>D-H-A/°</b> |
| O(7)-H(7A)-O(4)#1   | 0.85            | 2.09            | 2.896(4)        | 157.2          |
| O(7)-H(7B)-O(5)#2   | 0.87            | 1.96            | 2.791(4)        | 159.4          |
| O(9)-H(9B)-O(2)#3   | 0.88            | 1.86            | 2.735(5)        | 174.6          |
| O(11)-H(11A)-O(10)  | 0.85            | 2.10            | 2.857(5)        | 148.0          |

For **1-Eu**: #1, +x, 0.5-y, 0.5+z; 2, +x, 0.5-y, -0.5+z.

For **2-Tb**: #1, x, 1.5-y, 0.5+z; #2, x, 1.5-y, 0.5+z; #3, 1-x, 1-y, 1-z.

Table S5.  $K_{SV}$  values and LODs for the recently reported MOF-based luminescence probes for  $Fe^{3+}$

| MOF-based sensor                            | Linear Range [ $\mu M$ ] | LOD [ $\mu M$ ] | $K_{SV} \times 10^4$ [ $M^{-1}$ ] | Ref.      |
|---------------------------------------------|--------------------------|-----------------|-----------------------------------|-----------|
| $[Eu_2(2,3'-oba)_3(phen)_2]_n$              | 0-180                    | 7.93            | 1.37                              | [1]       |
| $\{[Eu(L)(HCOO)] \cdot H_2O\}_n$            | 0-100                    | 1.0             | 0.7461                            | [2]       |
| $[Tb(TBOT)(H_2O)](H_2O)_4(DMF)(NMP)_{0.5}$  | 0-100                    | 10              | 0.551                             | [3]       |
| $\{Zn_2(NO_3)_2(4,4'-bpy)_2(TBA)\}$         | 100-300                  | 7.18            | 0.748                             | [4]       |
| Zn-DTA                                      | 50-200                   | 0.82            | 0.84                              | [5]       |
| Cd-DTA                                      | 50-200                   | 1.07            | 0.64                              | [5]       |
| $[Cd_2(btc)(bib)(HCOO)(H_2O) \cdot H_2O]_n$ | 0-130                    | 1.56            | 0.605                             | [6]       |
| <b>1-Eu</b>                                 | 0-1600                   | 0.1565          | 1.629                             | This work |
| <b>2-Tb</b>                                 | 0-1600                   | 0.1567          | 1.626                             | This work |

Table S6.  $K_{SV}$  values and LODs for the recently reported MOF-based luminescence probes for aniline

| MOF-based sensor                 | Medium   | Linear Range [mM] | LOD [ $\mu M$ ] | $K_{SV}$ [ $M^{-1}$ ] | Ref.      |
|----------------------------------|----------|-------------------|-----------------|-----------------------|-----------|
| $[Ln(BTB)(H_2O)]_n$              | ethanol  | 0.005-5           | 5               | 1750                  | [7]       |
| Zn-Eu                            | methanol | 0.05-0.5          | 7.5             | 1200.2                | [8]       |
| Zn-Tb                            | methanol | 0.05-0.5          | 5.2             | 987.6                 | [8]       |
| $[EMI]_2[Eu_2(BDC)_3(H_2BDC)Cl]$ | DMF      | 0.1-5             | 10              | -                     | [9]       |
|                                  | water    | 0.1-5             | 6.8             | -                     |           |
| $Eu(BDC)Cl(H_2O)$                | DMF      | 0.01-5            | 7               | -                     | [9]       |
|                                  | water    | 0.5-10            | 9               | -                     |           |
| <b>1-Eu</b>                      | DMF      | 0-3.3             | 0.92            | 1696                  | This work |

References:

1. J.-M. Li, R. Li and X. Li, *CrystEngComm*, 2018, **20**, 4962-4972.
2. Y. Liu, J. Ma, C. Xu, Y. Yang, M. Xia, H. Jiang and W. Liu, *Dalton Trans.*, 2018, **47**, 13543-13549.
3. M. Chen, W.-M. Xu, J.-Y. Tian, H. Cui, J.-X. Zhang, C.-S. Liu and M. Du, *J. Mater. Chem. C*, 2017, **5**, 2015-2021.

4. X. Zhang, X. Zhuang, N. Zhang, C. Ge, X. Luo, J. Li, J. Wu, Q. Yang and R. Liu, *CrystEngComm*, 2019, **21**, 1948-1955.
5. L. Deng, Y. Zhang, D. Zhang, S. Jiao, J. Xu, K. Liu and L. Wang, *CrystEngComm*, 2019, **21**, 6056-6062.
6. J. Liu, J. Wang, J. Wu, L. Lu, H. Xu, M. Trivedi and A. Kumar, *Front. Chem.*, 2019, **7**, 244.
7. Y. Shi, W. M. Wang, G. P. Tang, Y. X. Zhang, M. Li and Z. L. Wu, *Polyhedron*, 2018, **153**, 122-127.
8. L. Li, J. Y. Zou, S. Y. You, H. M. Cui, G. P. Zeng and J. Z. Cui, *Dalton Trans.*, 2017, **46**, 16432-16438.
9. H.-J. Feng, L. Xu, B. Liu and H. Jiao, *Dalton Trans.*, 2016, **45**, 17392-17400.

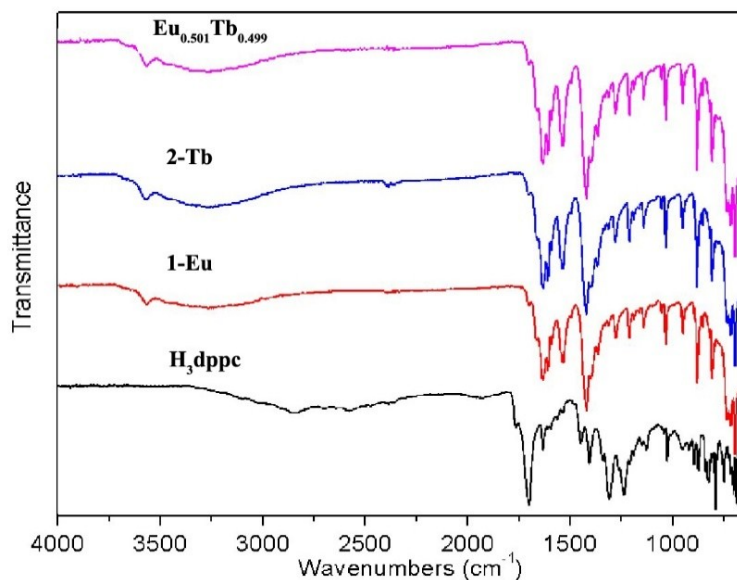

Fig. S1 IR spectra of H<sub>3</sub>dppc ligand and complexes **1-Eu**, **2-Tb** and **Eu<sub>0.501</sub>Tb<sub>0.499</sub>**.

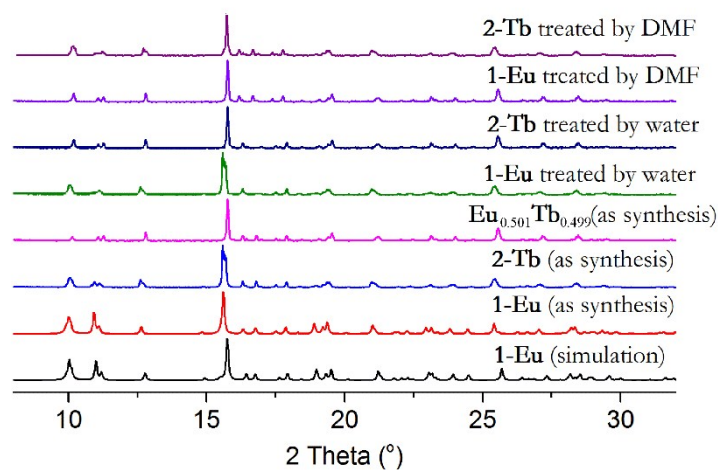

Fig. S2 PXRD patterns of complexes **1-Eu**, **2-Tb** and **Eu<sub>0.501</sub>Tb<sub>0.499</sub>** before and after being treated by water and DMF (for the first two Ln-CPs). The treatment process is as follows: 5mg of **1-Eu** or **2-Tb** was immersed in 5mL of H<sub>2</sub>O or DMF for 24 h, filtered and dried in air.

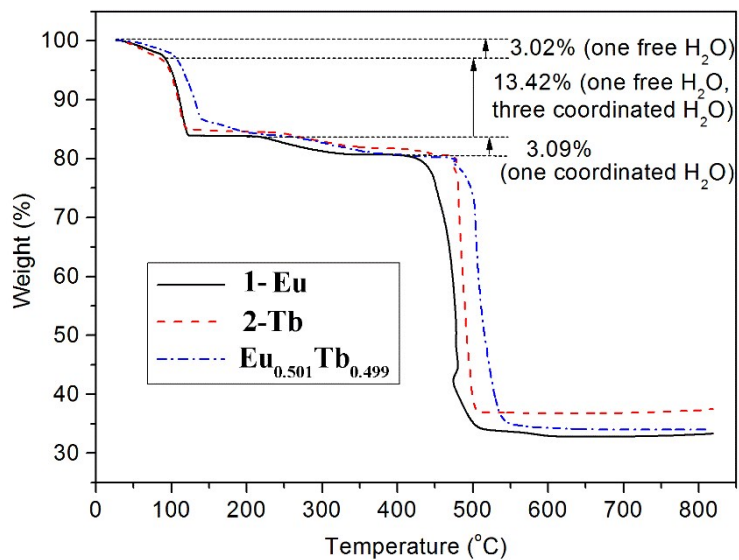

Fig. S3 TG curves of complexes **1-Eu** and **2-Tb**.

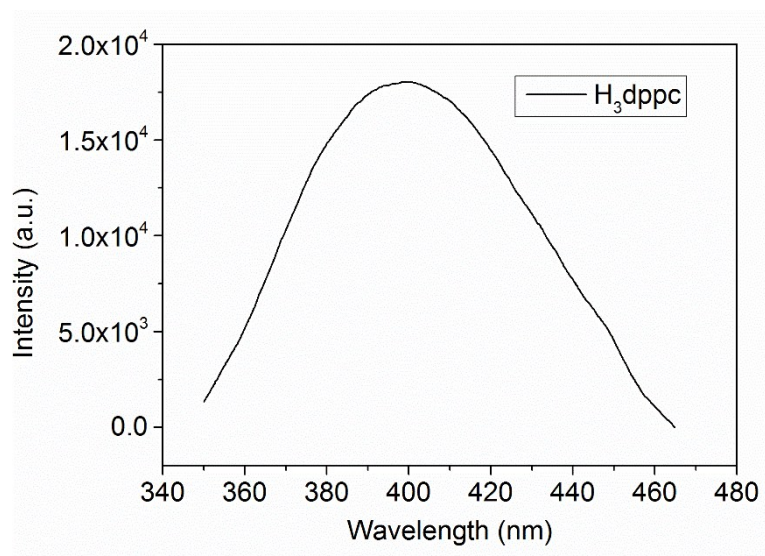

Fig. S4 Emission spectrum of the free ligand H<sub>3</sub>dppc.

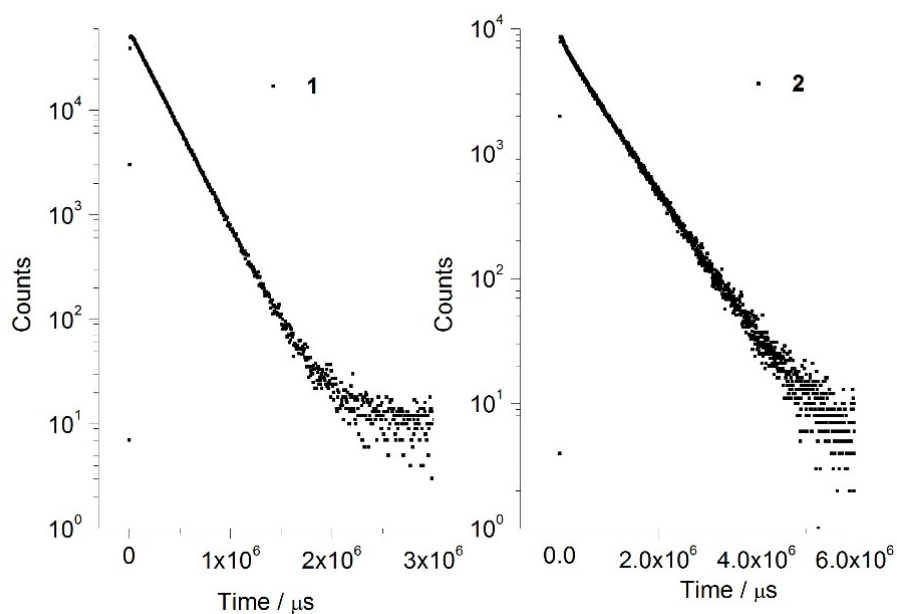

Fig. S5 Luminescence decay lifetimes of **1-Eu** and **2-Tb** upon excited at 300 nm and 330 nm, respectively



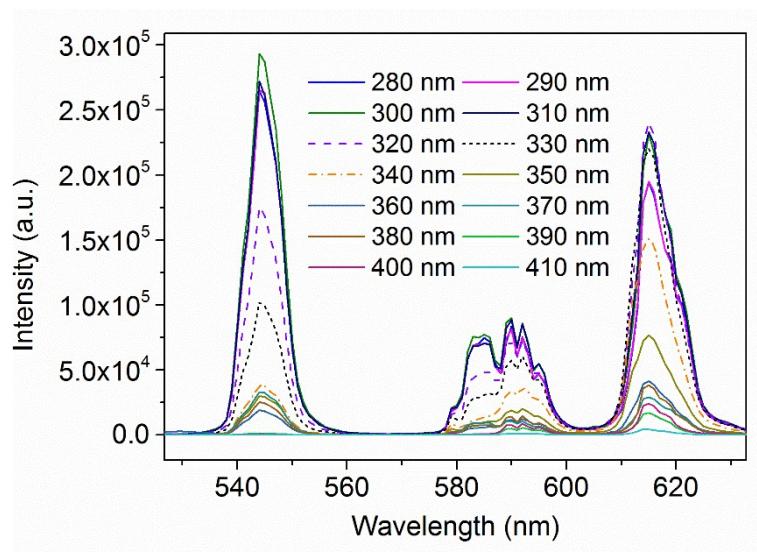

Fig. S6 Solid emission spectra of  $\text{Eu}_{0.501}\text{Tb}_{0.499}$  when excited under a series of excitation wavelength

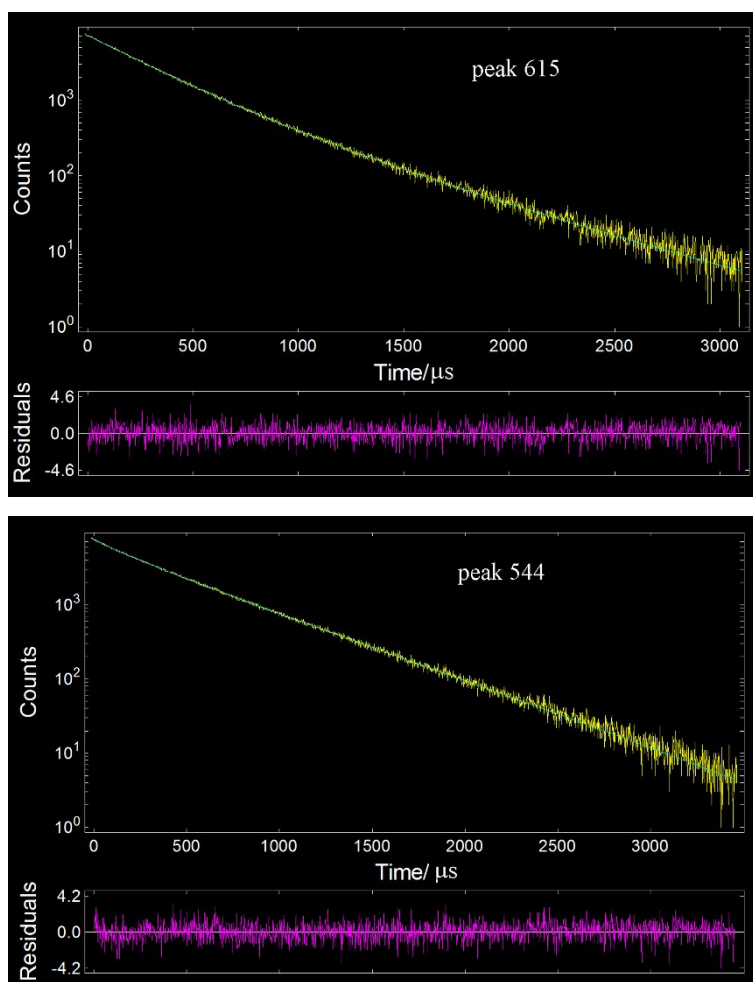

Fig. S7 Luminescence decay lifetimes of peaks 615 and 544 in  $\text{Eu}_{0.501}\text{Tb}_{0.499}$ -MOF upon excited at 310 nm

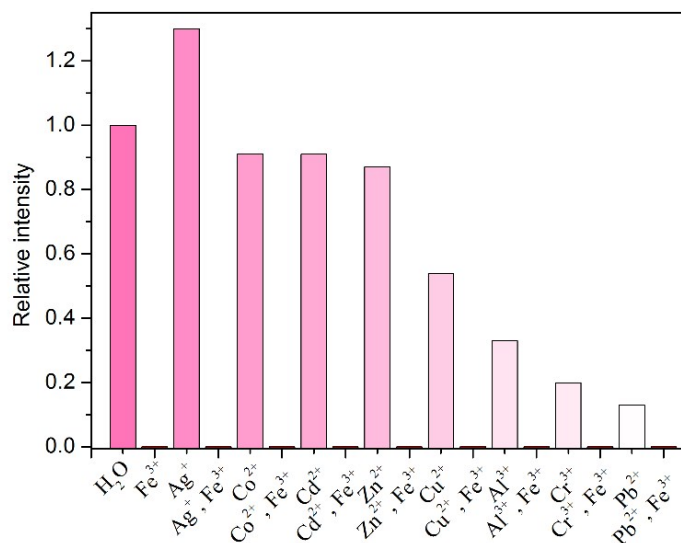

Fig. S8 Luminescent detection of different metal ions without or with Fe<sup>3+</sup> by **1-Eu**

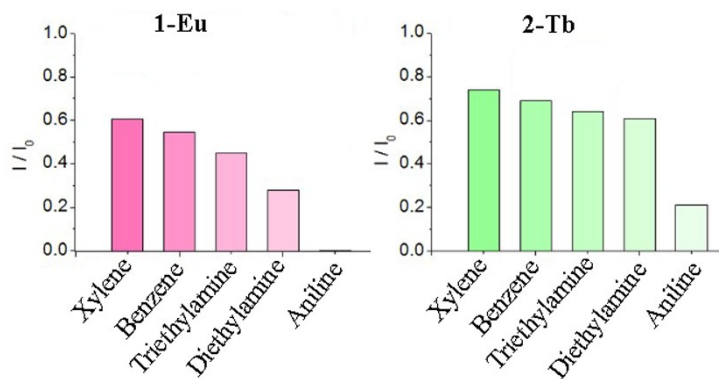

Fig. S9 Relative fluorescence intensities of **1-Eu** and **2-Tb** dispersed in DMF solution of aromatic series and amine series (0.1 mol/L) (the concentration of aniline used to quench the fluorescence of **1-Eu** is 0.01 mol/L).

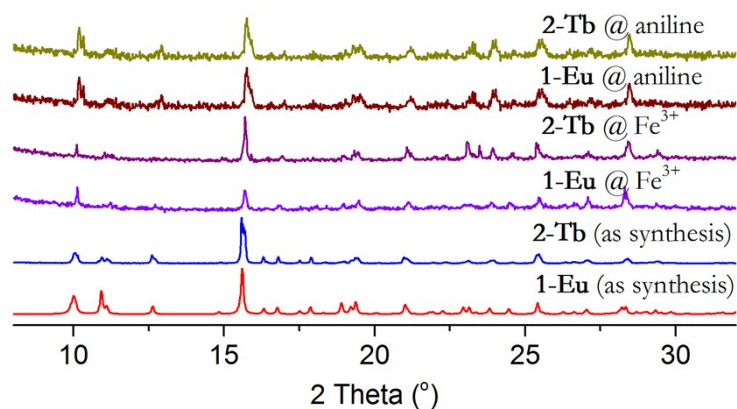

Fig. S10 PXR D patterns of complexes **1-Eu** and **2-Tb** before and after treatment by Fe<sup>3+</sup> aqueous solution or aniline. The treatment process is as follows: 5mg of 1-Eu or 2-Tb was immersed in 5mL of Fe(NO<sub>3</sub>)<sub>3</sub> aqueous solution (10<sup>-2</sup> mol/L) or DMF for 24 h, filtered and dried in air.

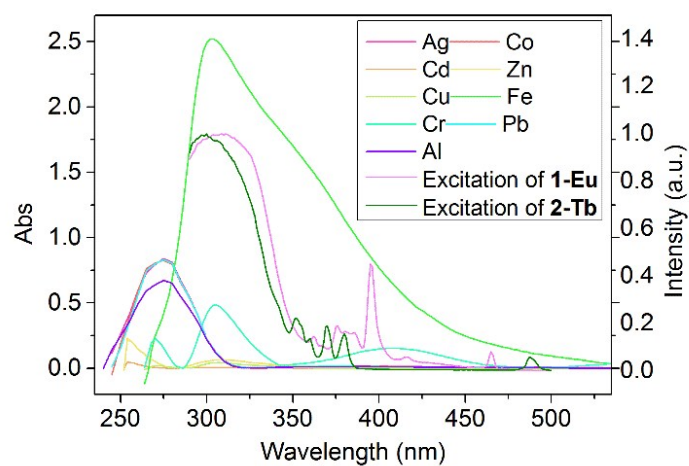

Figure S11. UV-Vis adsorption spectra of aqueous solutions of different metal ions (10<sup>-3</sup> mol/L) and excitation of **1-Eu** and **2-Tb** (2 mg) dispersed in aqueous solution (2 mL).

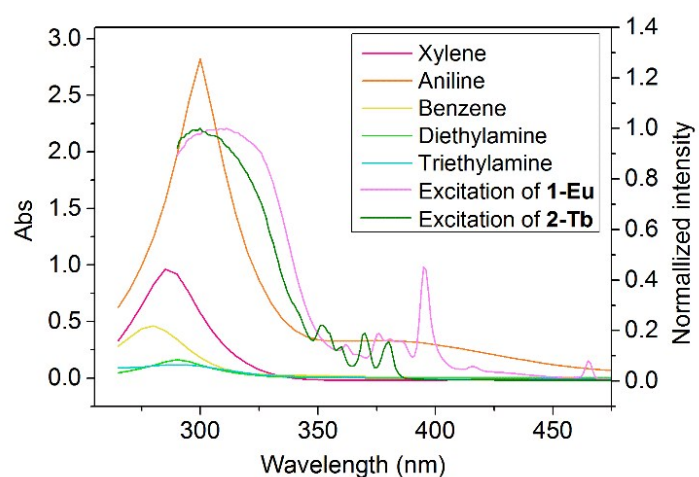

Figure S12. UV-Vis adsorption spectra of aqueous solutions of different organics ( $10^{-3}$  mol/L) in DMF solution and excitation of **1-Eu** and **2-Tb** (2 mg) dispersed in DMF solution (2 mL).

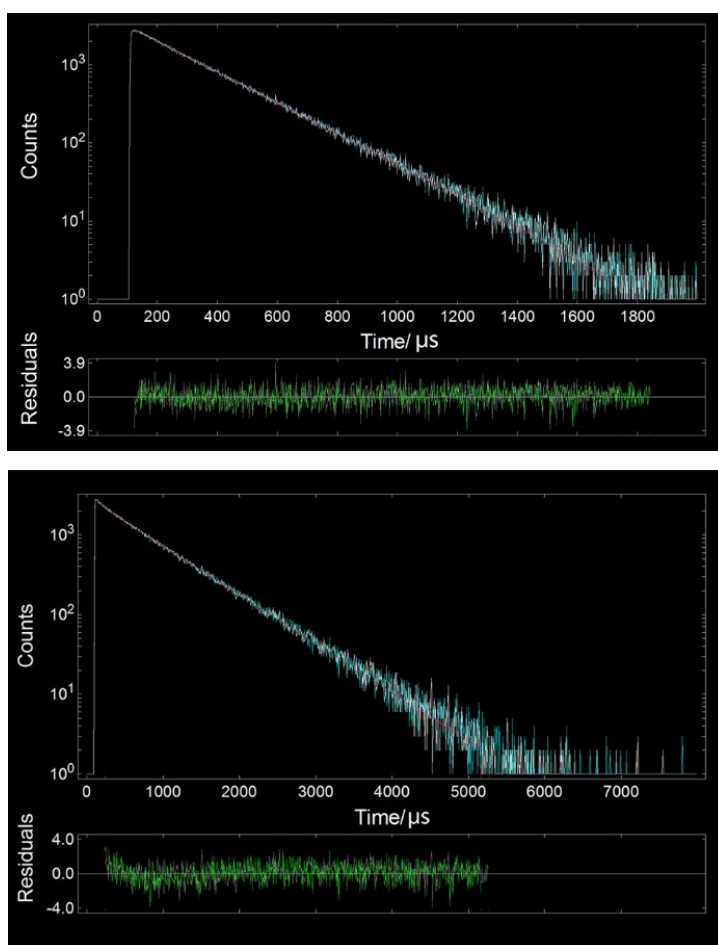

Fig. S13 Luminescence lifetimes of **1-Eu** or **2-Tb** in aqueous solution without (top) or with  $Fe^{3+}$  (bottom)

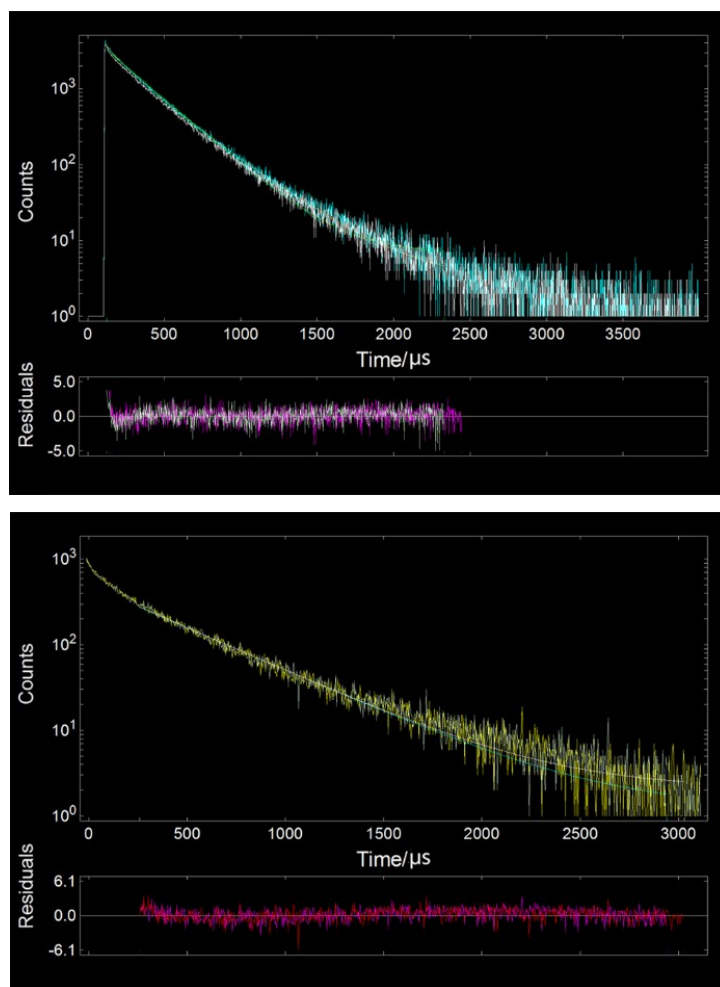

Fig. S14 Luminescence lifetimes of **1-Eu** or **2-Tb** in DMF solution without (top) or with aniline (bottom)
